# Supplementary material for: Al–C hybrid nanoclustered anodes for lithium ion batteries with high electrical capacity and cyclic stability
Source: Royal Society of Chemistry journal article supplement (doi:10.1039/c3cc47900e), 2013-12-02
Supplement: c3cc47900e.pdf [file c3cc47900e.pdf]

Electronic Supplementary Information

## Al-C Hybrid Nanoclustered Anodes for Lithium Ion Batteries with High Electrical Capacity and Cyclic Stability

Ji Hun Park,<sup>a</sup> Chairul Hudaya,<sup>a</sup> A-Young Kim,<sup>a</sup> Do Kyung Rhee,<sup>b</sup> Seon Ju Yeo,<sup>b</sup> Wonchang Choi,<sup>a</sup>  
Pil J. Yoo\*<sup>b</sup> and Joong Kee Lee\*<sup>a</sup>

<sup>a</sup> *Advanced Energy materials Processing Laboratory, Center for Energy Convergence Research, Green City Technology Institute, Korea Institute of Science and Technology (KIST), Seoul 130-650, Republic of Korea.*

<sup>b</sup> *School of Chemical Engineering and SKKU Advanced Institute of Nanotechnology (SAINT), Sungkyunkwan University, Suwon 440-746, Republic of Korea.*

*E-mail: pjyoo@skku.edu, leejk@kist.re.kr*

### 1. Materials Processing and Characterizations

**Synthesis of Al-C hybrid nanoclustered thin films** A PECVD system coupled with a pre-evaporator was designed for the experiments. The system consisted of two active zones: a vaporous zone and a radio frequency zone. The base pressure was brought to  $1 \times 10^{-6}$  Torr using a turbomolecular pump, backed by a rotary mechanical pump. Thermal evaporation-assisted PECVD deposition was applied to create the Al-C hybrid nanoclustered films on a Cu foil substrate. The carbon source of C<sub>60</sub> (Aldrich, CAS No: 99685-96-8) and Al precursor of tetramethyl aluminum (TMA, Aldrich, 99.9 %) as the organometallic source were used as received. TMA was introduced into the deposition chamber using Ar as a carrier gas. The samples were prepared under following conditions: a working pressure of 25 mTorr, H<sub>2</sub>/Ar ratio of 0.1, deposition time of 20 min, current of 25 A for thermal evaporation, and RF power (plasma power) at 200 W.

**Material Characterizations** The compositional distribution of the resulting Al-C hybrid films was analyzed with the backscattered electron images obtained from electron probe microanalyzer (EPMA, JEOL JXA-8900R). The Al-C hybrid nanoclustered electrodes were studied with TEM imaging and selected area electron diffraction (SAED) pattern analysis using a Tecnai F30TEM at an accelerating voltage of 200 kV. For a nuclear magnetic resonance (NMR, Varian VNMRS 400) characterization, thin-sliced bilayered specimens comprising 1.5- $\mu$ m-thick Al-C hybrid film and 10  $\mu$ m-thick substrate were carefully prepared and introduced to the sample holder of NMR. XPS analysis for chemical bond and atomic composition analysis was carried out using Ulvac-PHI (PHI

5000 VersaProbe) with a source of monochromatic  $\text{Al}_{K\alpha}$  (1486.6 eV) at an accelerating voltage of 15 kV under Ar atmosphere.

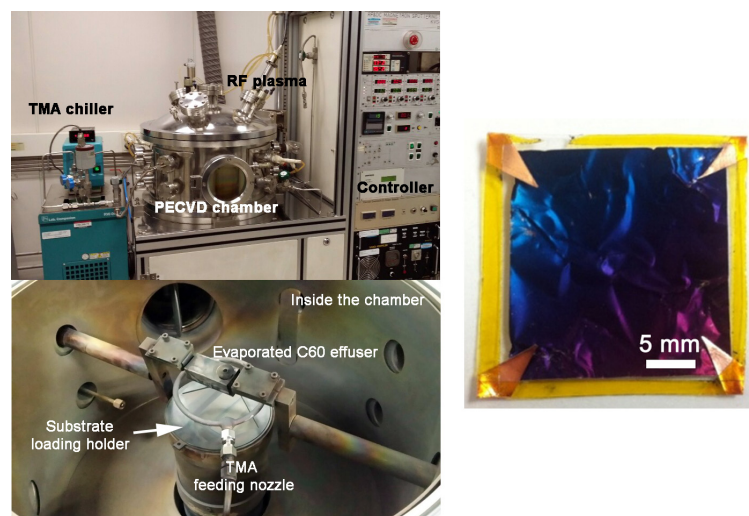

**Figure S1.** Digital camera images for experimental setup of thermal-evaporation assisted PECVD system (left) and Al-C hybrid clustered anode (right).

## 2. Electrochemical Measurements

The Al-C hybrid nanoclustered films (thickness = 1.5  $\mu\text{m}$ ) were investigated as anode material using pouch-type half cells (size = 2.2  $\times$  2.2  $\text{cm}^2$ ) assembled in an argon-filled glove box. The half cells comprised lithium metal as counter and reference electrodes, separator, and Al-C hybrid nanoclustered film as the anode electrode. The electrolyte contained 1M  $\text{LiPF}_6$  in EC:EMC:DMC (1:1:1, v/v/v). Cycling characteristics were tested at current densities of 6, 10, 15, and 20 A/g. To measure the loading mass of Al-C hybridized nanoclusters, the mass of CVD-deposited films was carefully weighed using high-precision microbalance (CPA26P, Sartorius Mechatronics, readability  $\sim$  0.002 mg) on anti-vibration table. Since neither binder nor conductive agents were added in the Al-C hybridized anodes, net weight of the deposited films could readily be obtained from the mass difference before and after the film deposition.

**Table S1.** Loading mass and applied current for cells with varying Al composition

| Al composition (wt %) | Measured loading mass (mg) | Applied current for 6 A/g condition (mA) |
|-----------------------|----------------------------|------------------------------------------|
| 10                    | 1.45 $\pm$ 0.03            | 8.7                                      |
| 20                    | 1.55 $\pm$ 0.03            | 9.3                                      |
| 40                    | 1.68 $\pm$ 0.03            | 10.0                                     |

### 3. Electrochemical Impedance Spectroscopic (EIS) Analysis

Electrochemical impedance spectroscopy (EIS) was carried out by applying a 0.1 mV amplitude signal from 1 MHz to 0.1 Hz during the first charge/discharge cycle, using a SOLATRON 1260 workstation with an Auto Lab Electrochemical system. The resulting EIS data for the Al-C hybrid nanoclustered electrode are shown in Fig. S2. The Nyquist plots for the initial 5 cycles imply that the cycles stabilize with minimal charge-transfer resistance from 138 to 15  $\Omega$ , which was confirmed by a size decrease in semicircles. This result matches the discussion from cyclic voltammetry tests described in the main text.

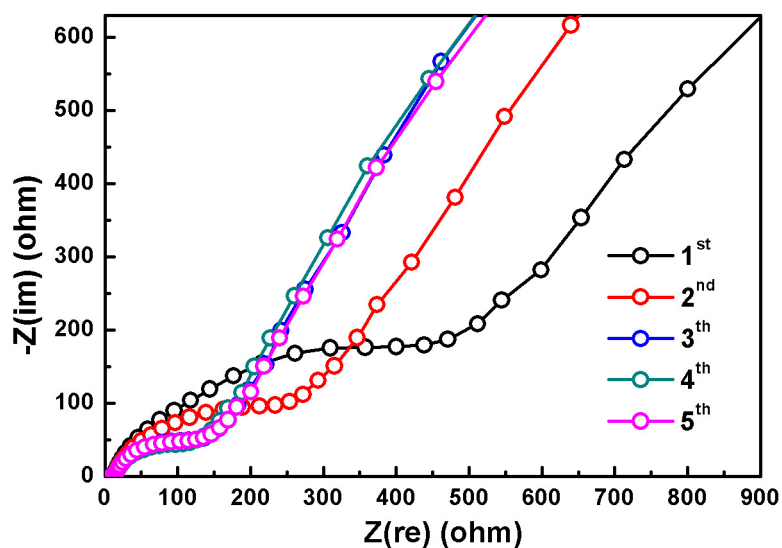

**Figure S2.** Nyquist plots from 1st to 5th for the Al-C hybrid nanoclustered anodes (40 wt% Al composition)
